# Supplementary material for: School Closures and ED Visits for Suicidality in Youths Before and During the COVID-19 Pandemic
Source: PubMed Central journal article supplement (PMC10638653; doi:10.1001/jamanetworkopen.2023.43001), 2023-11-10
Supplement: jamanetwopen-e2343001-s001.pdf [file jamanetwopen-e2343001-s001.pdf]

## **Data Sharing Statement**

Dvir. School Closures and ED Visits for Suicidality in Youths Before and During the COVID-19 Pandemic. *JAMA Netw Open*. Published online November 13, 2023. doi:10.1001/jamanetworkopen.2023.43001

### **Data**

**Data available:** No

### **Additional Information**

**Explanation for why data not available:** School closure data was publicly available through Burbio's School Opening Tracker. Emergency Department visit data is available upon request from from the MA Department of Public Health and the TX Department of State Health Services.
